# Supplementary material for: Comparison of anti-malarial drug efficacy in the treatment of uncomplicated malaria in African children and adults using network meta-analysis
Source: Springer Nature journal article supplement (doi:10.1186/s12936-017-1963-0), 2017-08-03
Supplement: MOESM3 [file 13348152]

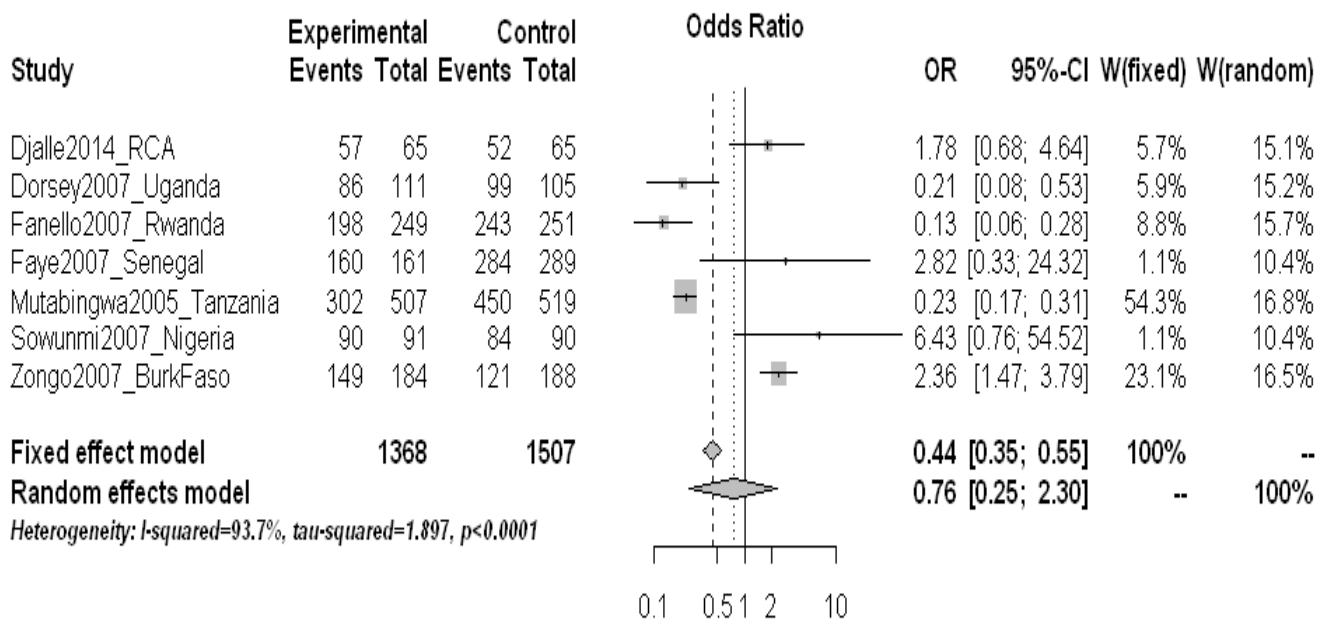

Figure 1: Head-to-head comparison of AQSP=ref and ARLM=control

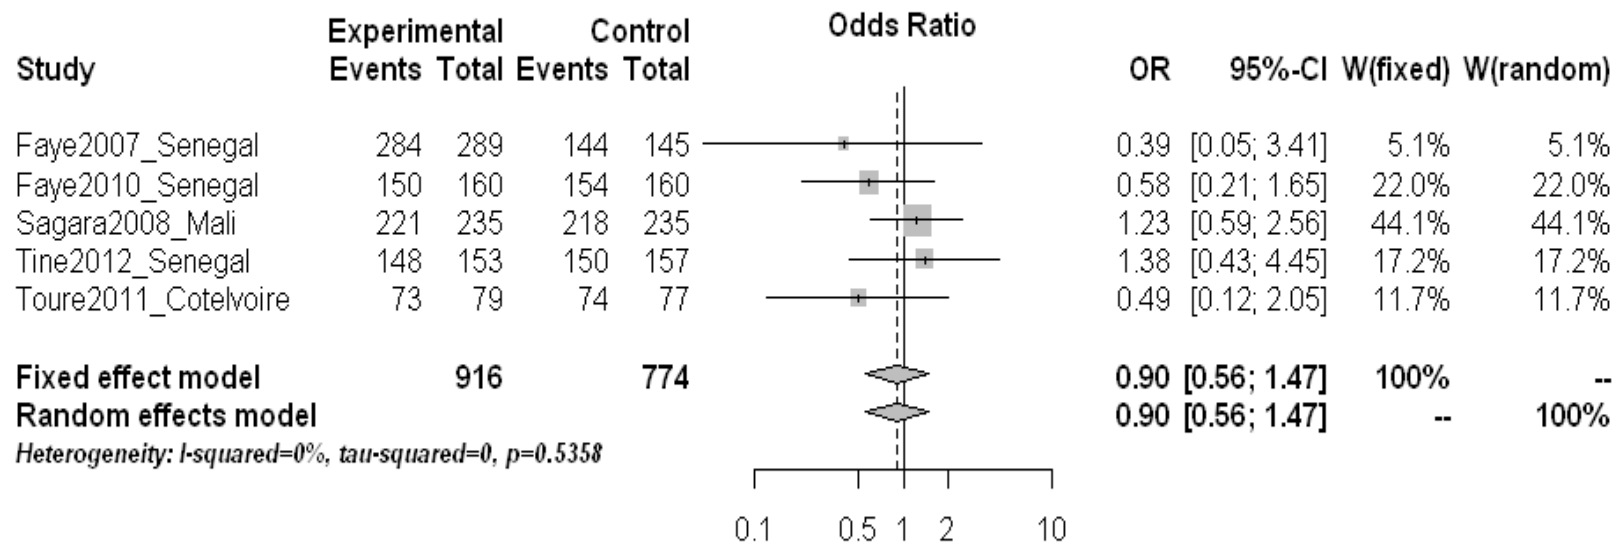

Figure 2: Head-to-head comparison of ARLM=ref and ASMQ=control

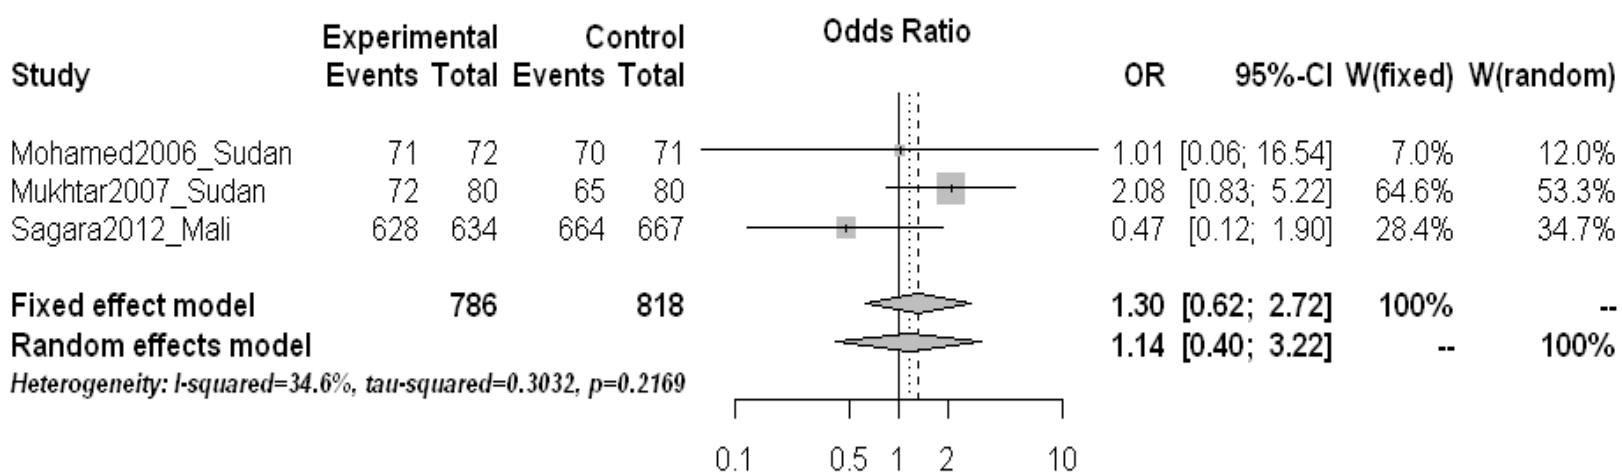

Figure 3: Head-to-head comparison of ARLM=ref and ASSP=control

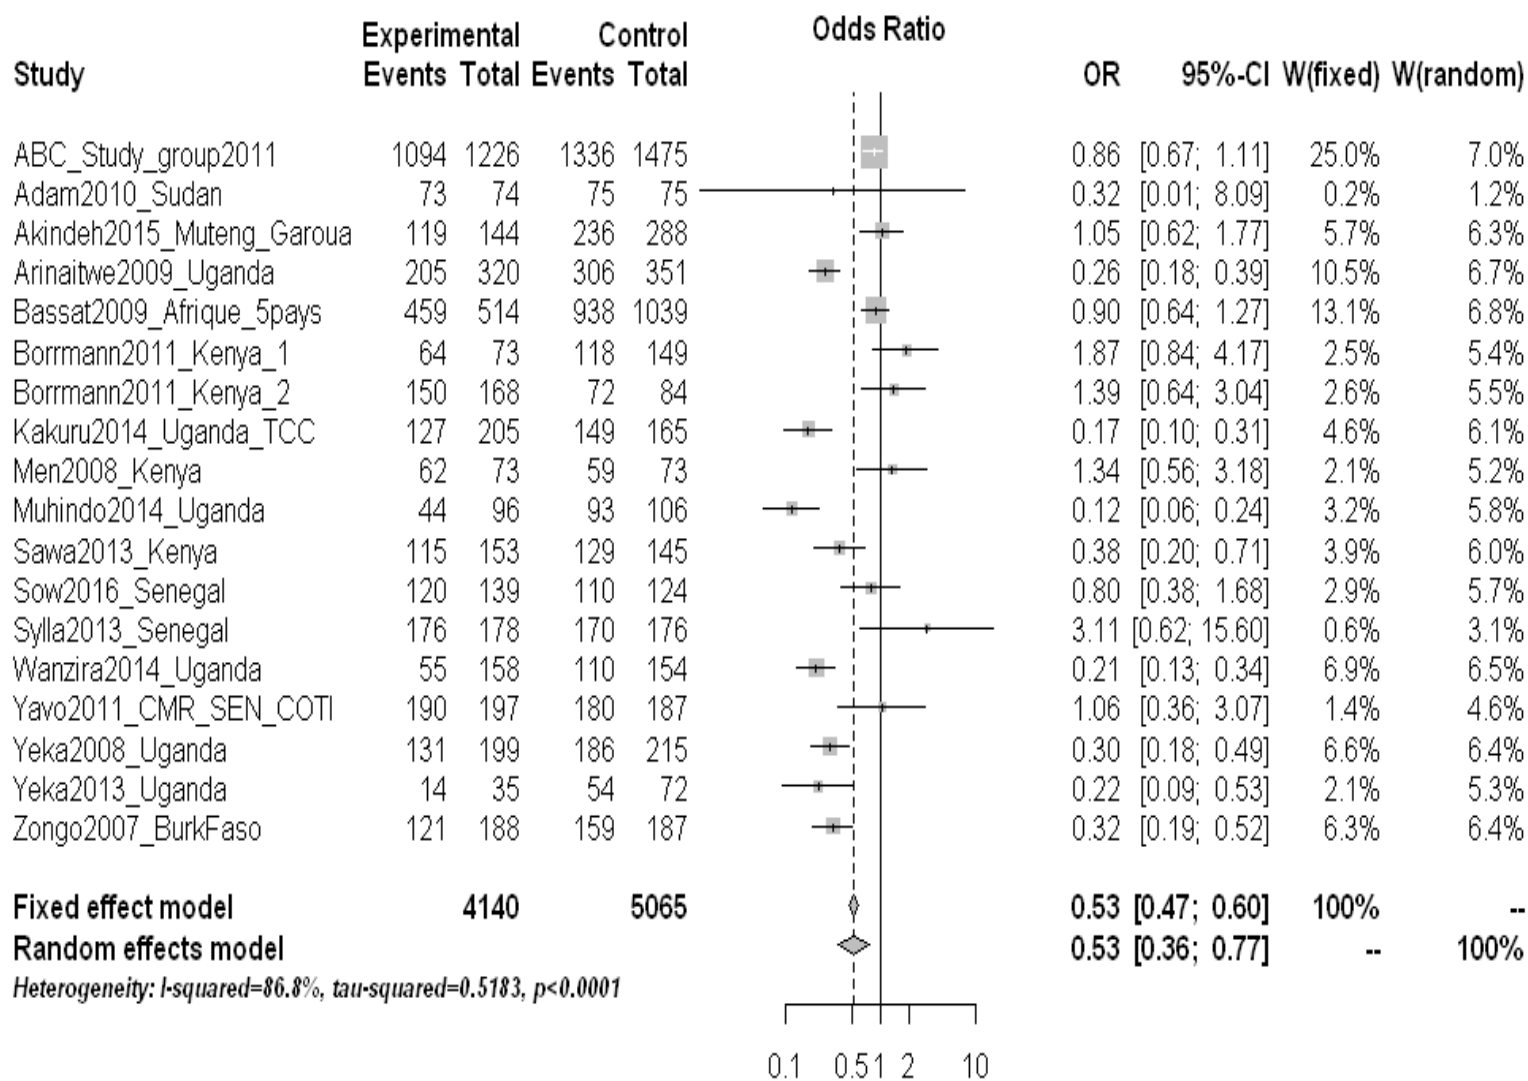

Figure 4: Head-to-head comparison of ARLM=ref and DHPP=control

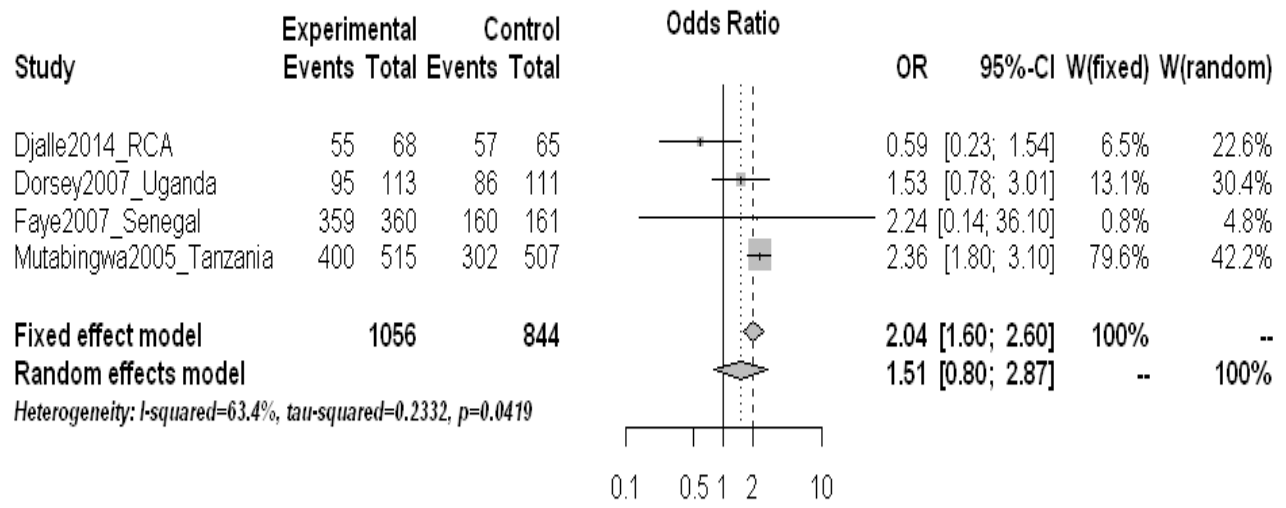

Figure 5: Head-to-head comparison of ASAQ=ref and AQSP=control

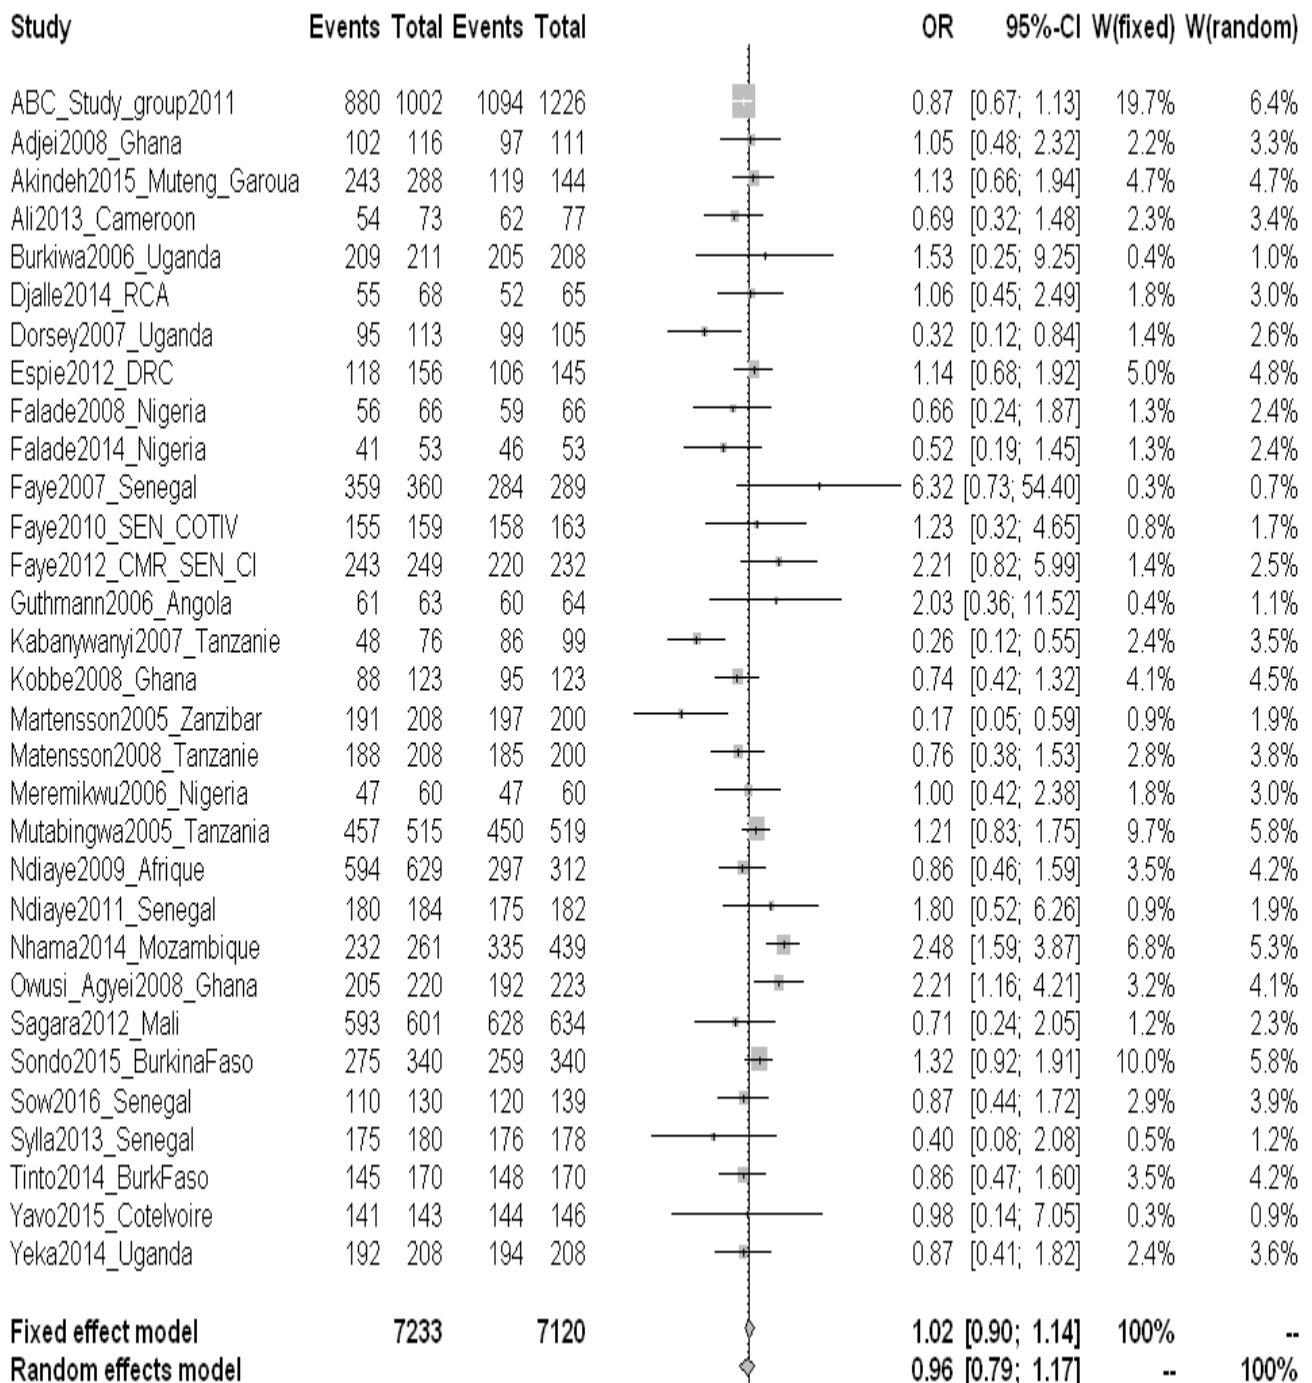

Figure 6: Head-to-head comparison of ASAQ=ref and ARLM=control

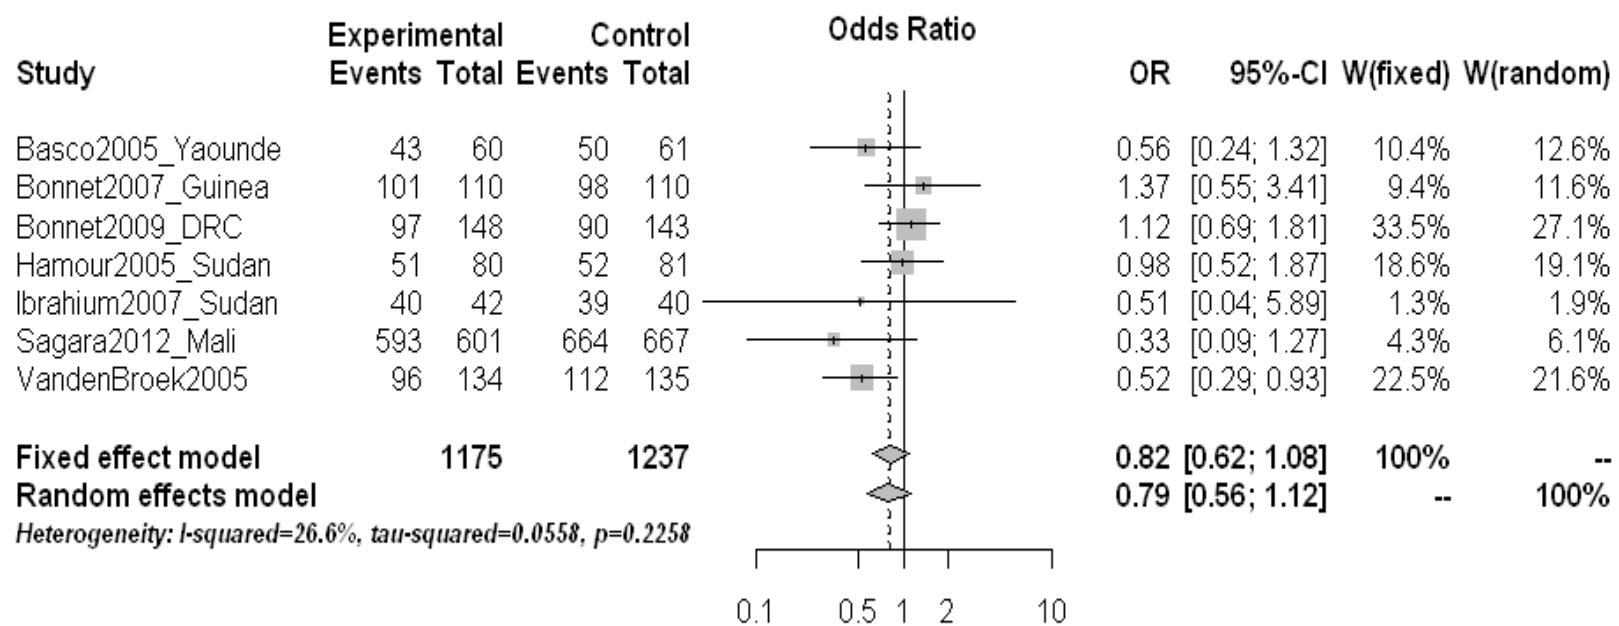

Figure 7: Head-to-head comparison of ASAQ=ref and ASSP=control

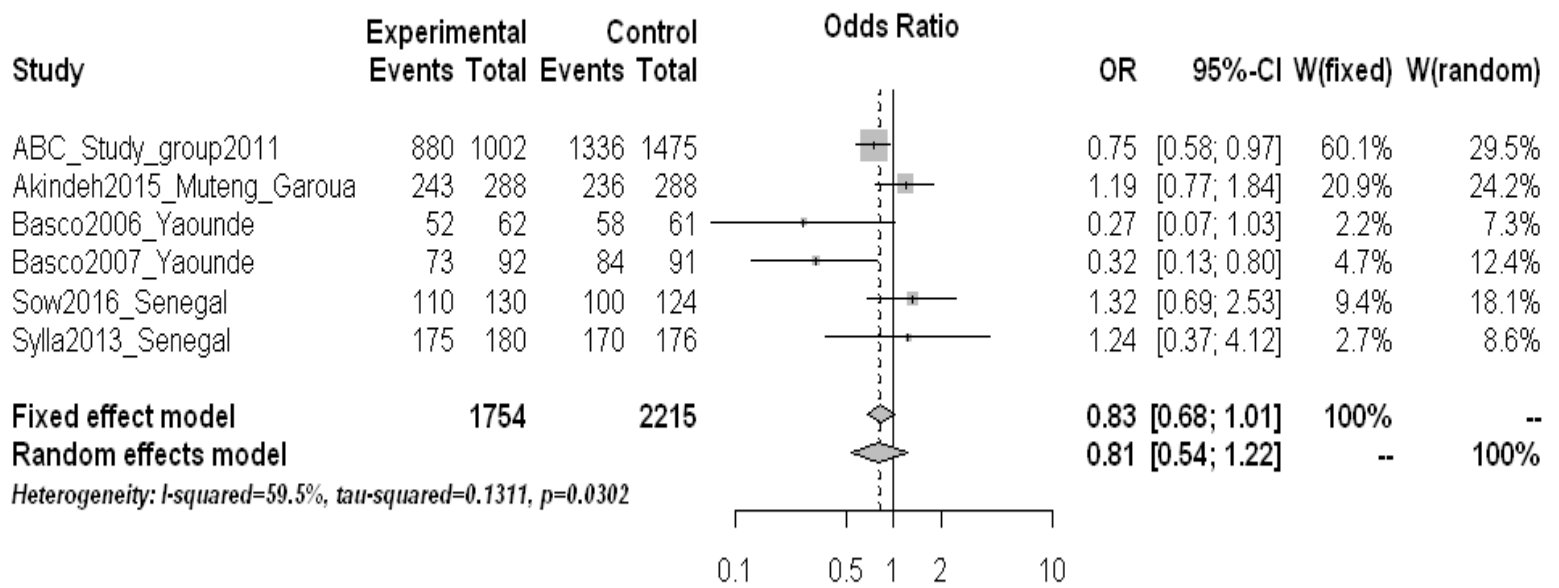

Figure 8: Head-to-head comparison of ASAQ=ref and DHPP=control



| Node d[k,k'] | Treatment k=<br>control | Treatment k'=<br>reference | Number of trials | Mean LogOR<br>of ref vs ctrl | sd     |
|--------------|-------------------------|----------------------------|------------------|------------------------------|--------|
| d[1,2]       | ARLM                    | AQSP                       | 7                | -0.0454                      | 0.3923 |
| d[1,3]       | ARLM                    | ASAQ                       | 31               | 0.08636                      | 0.1855 |
| d[1,4]       | ARLM                    | ASAQCPH                    | 1                | 0.6474                       | 1.058  |
| d[1,5]       | ARLM                    | ASATPG                     | 0                | -0.1407                      | 100.4  |
| d[1,6]       | ARLM                    | ASCD                       | 4                | -0.2814                      | 0.5437 |
| d[1,7]       | ARLM                    | ASMQ                       | 5                | 0.2315                       | 0.5016 |
| d[1,8]       | ARLM                    | ASNAPH                     | 2                | -0.1993                      | 1.366  |
| d[1,9]       | ARLM                    | ASPY                       | 2                | 0.3429                       | 0.6722 |
| d[1,10]      | ARLM                    | ASSMP                      | 3                | 0.5023                       | 0.6382 |
| d[1,11]      | ARLM                    | ASSP                       | 3                | -0.0148                      | 0.6949 |
| d[1,12]      | ARLM                    | DHPP                       | 18               | 0.6312                       | 0.2367 |
| d[1,13]      | ARLM                    | DHPPT                      | 1                | 0.3795                       | 1.035  |
| d[2,3]       | AQSP                    | ASAQ                       | 4                | -0.0997                      | 100.3  |
| d[2,4]       | AQSP                    | ASAQCPH                    | 0                | 0.194                        | 100.6  |
| d[2,5]       | AQSP                    | ASATPG                     | 0                | 0.0818                       | 99.58  |
| d[2,6]       | AQSP                    | ASCD                       | 0                | 0.2918                       | 99.79  |
| d[2,7]       | AQSP                    | ASMQ                       | 2                | 0.3891                       | 1.037  |
| d[2,8]       | AQSP                    | ASNAPH                     | 0                | -0.1155                      | 99.81  |
| d[2,9]       | AQSP                    | ASPY                       | 0                | 0.5803                       | 100.2  |
| d[2,10]      | AQSP                    | ASSMP                      | 1                | 0.3003                       | 99.73  |
| d[2,11]      | AQSP                    | ASSP                       | 1                | -0.177                       | 0.9994 |
| d[2,12]      | AQSP                    | DHPP                       | 3                | 0.7597                       | 0.6557 |
| d[2,13]      | AQSP                    | DHPPT                      | 0                | 0.7231                       | 100.2  |
| d[3,4]       | ASAQ                    | ASAQCPH                    | 1                | 0.8938                       | 99.85  |
| d[3,5]       | ASAQ                    | ASATPG                     | 0                | 1.225                        | 1.086  |
| d[3,6]       | ASAQ                    | ASCD                       | 2                | 0.6311                       | 99.84  |
| d[3,7]       | ASAQ                    | ASMQ                       | 1                | -0.7518                      | 100.1  |
| d[3,8]       | ASAQ                    | ASNAPH                     | 1                | -0.1846                      | 99.78  |
| d[3,9]       | ASAQ                    | ASPY                       | 0                | 0.1836                       | 99.59  |
| d[3,10]      | ASAQ                    | ASSMP                      | 2                | -0.6735                      | 0.972  |
| d[3,11]      | ASAQ                    | ASSP                       | 7                | 0.1922                       | 0.4338 |
| d[3,12]      | ASAQ                    | DHPP                       | 6                | 1.273                        | 0.7718 |
| d[3,13]      | ASAQ                    | DHPPT                      | 0                | 0.2256                       | 99.59  |
| d[4,5]       | ASAQCPH                 | ASATPG                     | 0                | 0.3247                       | 100.1  |
| d[4,6]       | ASAQCPH                 | ASCD                       | 0                | 0.1505                       | 100.5  |
| d[4,7]       | ASAQCPH                 | ASMQ                       | 0                | -0.0691                      | 99.37  |
| d[4,8]       | ASAQCPH                 | ASNAPH                     | 0                | 0.3129                       | 99.7   |
| d[4,9]       | ASAQCPH                 | ASPY                       | 0                | 0.2768                       | 99.44  |
| d[4,10]      | ASAQCPH                 | ASSMP                      | 0                | 0.03252                      | 99.26  |
| d[4,11]      | ASAQCPH                 | ASSP                       | 0                | 0.659                        | 100.3  |
| d[4,12]      | ASAQCPH                 | DHPP                       | 0                | -0.6399                      | 100    |
| d[4,13]      | ASAQCPH                 | DHPPT                      | 0                | 0.4048                       | 99.95  |

Table 1: The fitted model with inconsistency assumption provided 2-by-2 comparisons; comparisons given the other treatments as common comparators follow.

| Node d[k,k'] | Treatment k=<br>control | Treatment k'=<br>reference | Number of trials | Mean LogOR<br>of ref vs ctrl | sd     |
|--------------|-------------------------|----------------------------|------------------|------------------------------|--------|
| d[5,6]       | ASATPG                  | ASCD                       | 0                | 0.173                        | 99.86  |
| d[5,7]       | ASATPG                  | ASMQ                       | 0                | -0.0829                      | 99.86  |
| d[5,8]       | ASATPG                  | ASNAPH                     | 0                | -0.1185                      | 100.8  |
| d[5,9]       | ASATPG                  | ASPY                       | 0                | -1.053                       | 100.1  |
| d[5,10]      | ASATPG                  | ASSMP                      | 0                | -0.2764                      | 99.54  |
| d[5,11]      | ASATPG                  | ASSP                       | 0                | -0.1506                      | 100.1  |
| d[5,12]      | ASATPG                  | DHPP                       | 0                | 0.8972                       | 99.79  |
| d[5,13]      | ASATPG                  | DHPPT                      | 0                | -0.5034                      | 99.9   |
| d[6,7]       | ASCD                    | ASMQ                       | 0                | 0.1101                       | 99.93  |
| d[6,8]       | ASCD                    | ASNAPH                     | 0                | -0.1616                      | 99.86  |
| d[6,9]       | ASCD                    | ASPY                       | 0                | 0.02656                      | 99.47  |
| d[6,10]      | ASCD                    | ASSMP                      | 0                | 0.2459                       | 100    |
| d[6,11]      | ASCD                    | ASSP                       | 1                | 1.808                        | 1.013  |
| d[6,12]      | ASCD                    | DHPP                       | 1                | 0.237                        | 100.3  |
| d[6,13]      | ASCD                    | DHPPT                      | 0                | -0.0264                      | 100.6  |
| d[7,8]       | ASMQ                    | ASNAPH                     | 0                | -0.3731                      | 100.1  |
| d[7,9]       | ASMQ                    | ASPY                       | 0                | -0.0517                      | 99.88  |
| d[7,10]      | ASMQ                    | ASSMP                      | 0                | -0.2189                      | 99.84  |
| d[7,11]      | ASMQ                    | ASSP                       | 0                | -0.049                       | 100.7  |
| d[7,12]      | ASMQ                    | DHPP                       | 0                | 0.4478                       | 100.2  |
| d[7,13]      | ASMQ                    | DHPPT                      | 0                | 0.8446                       | 99.29  |
| d[8,9]       | ASNAPH                  | ASPY                       | 0                | 0.1556                       | 100.2  |
| d[8,10]      | ASNAPH                  | ASSMP                      | 0                | -0.5263                      | 100.5  |
| d[8,11]      | ASNAPH                  | ASSP                       | 0                | 0.3574                       | 99.81  |
| d[8,12]      | ASNAPH                  | DHPP                       | 0                | -0.8014                      | 100.2  |
| d[8,13]      | ASNAPH                  | DHPPT                      | 0                | -0.4107                      | 99.82  |
| d[9,10]      | ASPY                    | ASSMP                      | 0                | 0.1542                       | 99.22  |
| d[9,11]      | ASPY                    | ASSP                       | 0                | 0.04094                      | 99.97  |
| d[9,12]      | ASPY                    | DHPP                       | 0                | 0.2887                       | 100.2  |
| d[9,13]      | ASPY                    | DHPPT                      | 0                | 0.2626                       | 100.3  |
| d[10,11]     | ASSMP                   | ASSP                       | 0                | -1.56                        | 10 0.4 |
| d[10,12]     | ASSMP                   | DHPP                       | 0                | -0.5191                      | 100.3  |
| d[10,13]     | ASSMP                   | DHPPT                      | 0                | -0.6216                      | 100    |
| d[11,12]     | ASSP                    | DHPP                       | 0                | -0.4688                      | 100.2  |
| d[11,13]     | ASSP                    | DHPPT                      | 0                | 0.01358                      | 100.7  |
| d[12,13]     | DHPP                    | DHPPT                      | 0                | -0.5988                      | 99.78  |

Table 2: The fitted model with inconsistency assumption provided 2-by-2 comparisons; comparisons given the other treatments as common comparators follow.
