# Supplementary material for: Comparison of anti-malarial drug efficacy in the treatment of uncomplicated malaria in African children and adults using network meta-analysis
Source: Malar J. 2017 Aug 3;16:311. doi: 10.1186/s12936-017-1963-0 (PMC5543626; doi:10.1186/s12936-017-1963-0)
Supplement: Supplementary file 1 — Additional file 1. Description of the trials characteristics. The file contains the description within each article in terms of trial characteristics, including the number of treatment arms (a), the list of treatment (k), the enrolled population (n) and the number of observed PCR-corrected ACPR (r). The file also contains the number of studies for each pairwise comparison. [file 12936_2017_1963_MOESM1_ESM.xlsx]

## Sheet: included trials characteristics
Articles and publication years	region	Study period	Type of study/Design	Follow-up	Poluation/Age	Transmission level	Trrk	trtb	a	k	n	r_28_PCR_corrected
ABC_Study_group2011	Africa (seven countries):	July2007-June 2009	multicentre,randomized	28_63	6-59months		ARLM	ASAQ	4	1	1226	1094
ABC_Study_group2011	Burkina Faso,Gabon, Rwanda	July2007-June 2009	non-inferiority;7-countries	28_63	6-59months		ASAQ	ASAQ	4	3	1002	880
ABC_Study_group2011	Uganda,Zambia,Nigeria,	July2007-June 2009		28_63	6-59months		ASCD	ASAQ	4	6	413	326
ABC_Study_group2011	Mozambique	July2007-June 2009		28_63	6-59months		DHPP	ASAQ	4	13	1475	1336
Adam2010_Sudan	Sudan	Dec2009-Feb2010	non-inferiority	28	6 to 59 months	Low endemic	ARLM	ARLM	2	1	74	73
Adam2010_Sudan	Sudan	Dec2009-Feb2010	randomized	28	6 to 59 months		DHPP	ARLM	2	13	75	75
Adjei2008_Ghana	Ghana	Oct2004-Dec2006	randomized	28	6 months to 14 years	holoendemic, perennial, seasonal	ARLM	ASAQ	2	1	111	97
Adjei2008_Ghana	Ghana	Oct2004-Dec2006	two center, children	28	6 months to 14 years		ASAQ	ASAQ	2	3	116	102
Akindeh2015_Muteng_Garoua	Cameroun	2009-2013	randomized	28_42	6months-10 yrs	seasonal	ARLM	ASAQ	3	1	144	119
Akindeh2015_Muteng_Garoua	Cameroun	2009-2013	two-centre	28_42	and adults		ASAQ	ASAQ	3	3	288	243
Akindeh2015_Muteng_Garoua	Cameroun	2009-2013		28_42			DHPP	ASAQ	3	13	288	236
Ali2013_Ngaoundere	Cameroun	Sept2007-Dec2007	randomized	28	6months-14 years	Low	ASAQ	ASAQ	2	1	77	62
Ali2013_Ngaoundere	Cameroon	Sept2007-Dec2007	one_centre	28	6months-14 years		ARLM	ASAQ	2	3	73	54
Arinaitwe2009_Uganda	Uganda	Aug2007-April2008	randomized	>28	6 weeks-12 months	Mesoendemic	ARLM	ARLM	2	1	320	205
Arinaitwe2009_Uganda	Uganda	Aug2007-April2008	controlled trial	>28	and <= 20months		DHPP	ARLM	2	13	351	306
Ayede2010_Nigeria	Nigeria	NR	Randomized	28	1-13 years	perennial_high	ASAQ	ASAQ	2	3	250	233
Ayede2010_Nigeria	Nigeria		two centre	28	1-13 years		ASSMP	ASAQ	2	10	250	219
Basco2005_Yaounde*	Cameroon	Feb2005-May2005	randomized	28	6-59 months	High	ASAQ	ASAQ	2	3	60	43
Basco2005_Yaounde*	Cameroon	Feb2005-May2005	one center	28	6-59 months		ASSP	ASAQ	2	11	61	50
Basco2006_Yaounde*	Cameroun	Apr2006-June2006	randomized	28	6-59 months	High	AQSP	AQSP	2	2	67	55
Basco2006_Yaounde*	Cameroun	Apr2006-June2006	two center	28	6-59 months		ASMQ	AQSP	2	7	69	60
Basco2006b_Yaounde*	Cameroon	Dec2006-Feb2007	randomized	28	6-59 months	High	ASCD	ASCD	2	6	86	53
Basco2006b_Yaounde*	Cameroon	Dec2006-Feb2007	two center	28	6-59 months		ASSP	ASCD	2	11	82	74
Basco2006c_Yaounde*	Cameroon	Sept2006-Nov2006	randomized	28	6-59 months	High	ASAQ	ASAQ	2	3	62	52
Basco2006c_Yaounde*	Cameroon	Sept2006-Nov2006	one center	28	0 -60 months		DHPP	ASAQ	2	13	61	58
Basco2007_Yaounde*	Cameroon	2007	randomized	28	6-59 months	High	ASAQ	ASAQ	2	3	92	73
Basco2007_Yaounde*	Cameroon	2007	one center	28			DHPP	ASAQ	2	13	91	84
Bassat2009_Africa_5countries	Africa	2005-2006	Multicentre, Randomized	28	6-59 months		ARLM	ARLM	2	1	514	459
Bassat2009_Africa_5countries	Africa	2005-2006	non-inferiority trial; children	28			DHPP	ARLM	2	13	1039	938
Bonnet2007_Guinea	Guinea	June-Sept2004	Randomisd	28	6-59 months	High	ASAQ	ASAQ	2	3	110	101
Bonnet2007_Guinea	Guinea	June-Sept2004	one center	28			ASSP	ASAQ	2	11	110	98
Bonnet2009_DRC	DRC	2003-2004	Randomized	28	6-59 months	High	ASAQ	ASAQ	2	3	148	97
Bonnet2009_DRC	DRC	2003-2004	one center	28			ASSP	ASAQ	2	11	143	90
Borrmann2011_Kenya_1	Kenya	2005-2006	randomized	28	6-59 months	High	ARLM	ARLM	2	1	73	64
Borrmann2011_Kenya_1	Kenya	2005-2006	two center	28	6-59 months		DHPP	ARLM	2	13	149	118
Borrmann2011_Kenya_2	Kenya	2007-2008	children	28	6-59 months	High	ARLM	ARLM	2	1	168	150
Borrmann2011_Kenya_2	Kenya	2007-2008		28	6-59 months		DHPP	ARLM	2	13	84	72
Burkiwa2006_Uganda	Uganda	Dec2004-July2005	randomized,single blind	28	1-10 years	Holoendemic-Perennial	ARLM	ARLM	2	1	208	205
Burkiwa2006_Uganda	Uganda	Dec2004-July2005	single center	28			ASAQ	ARLM	2	3	211	209
Djalle2014_RCA	RCA	May2008-May2009	prospective Randomized, open label trial	28	6-59 months	High	ARLM	ASAQ	4	1	60	48
Djalle2014_RCA	RCA	May2008-May2009	one-center	28			AQSP	ASAQ	4	2	65	57
Djalle2014_RCA	RCA	May2008-May2009		28			ASAQ	ASAQ	4	3	68	55
Djalle2014_RCA	RCA	May2008-May2009		28			ASSMP	ASAQ	4	11	58	50
Dorsey2007_Uganda	Uganda	Nov2004-June2006	single blind randomized	28	1-10 years	Mesoendemic	ARLM	ARLM	3	1	105	104
Dorsey2007_Uganda	Uganda	Nov2004-June2006	one center	28			AQSP	AQSP	3	2	111	95
Dorsey2007_Uganda	Uganda	Nov2004-June2006		28			ASAQ	AQSP	3	3	113	108
Espie2012_DRC	DRC	April2008-March2009	Randomized, non-inferiority	42	6-59 months	High	ARLM	ASAQ	2	1	145	106
Espie2012_DRC	DRC	April2008-March2009	open-label	42	6-59 months		ASAQ	ASAQ	2	3	156	118
Falade2008_Nigeria	Nigeria	Aug2004-Aug2005	randomized	28	6-10years	perennial_high	ARLM	ASAQ	2	1	66	59
Falade2008_Nigeria	Nigeria	Aug2004-Aug2005	open lab RCT	28	6-10years		ASAQ	ASAQ	2	3	66	56
Falade2014_Nigeria	Nigeria	Aug2007-may2008	Randomized	28	6-14 years	perennial_high	ARLM	ASAQ	3	1	53	41
Falade2014_Nigeria	Nigeria	Aug2007-may2008	open-labelled	28_42			ASAQ	ASAQ	3	3	53	46
Falade2014_Nigeria	Nigeria	Aug2007-may2008		28_42			ASAQCPH	ASAQ	3	4	54	47
Fanello2007_Rwanda	Rwanda	2004-2005	randomized, open label	28	12-59months	seasonal, high	ARLM	ARLM	2	1	251	243
Fanello2007_Rwanda	Rwanda	2004-2005	2-centre in children	28			AQSP	ARLM	2	2	249	198
Faye2007_Senegal	Senegal	2002-2003	analytical; open,	28_42	>=6 months	Low	ARLM	ASAQ	4	1	289	284
Faye2007_Senegal	Senegal	2002-2003	Randomized	28_42	>=6 months		AQSP	ASAQ	4	2	161	160
Faye2007_Senegal	Senegal	2002-2003		28_42	>=6 months		ASAQ	ASAQ	4	3	360	359
Faye2007_Senegal	Senegal	2002-2003		28_42	>=6 months		ASMQ	ASAQ	4	7	145	144
Faye2010_SEN_COTIV	SEN_COTIV	Sept2007-Jan2008	Multicentre, Randomized trial	28	>7 years		ARLM	ASAQ	2	1	163	158
Faye2010_SEN_COTIV	SEN_COTIV	Sept2007-Jan2008		28			ASAQ	ASAQ	2	3	159	155
Faye2010_Senegal	Senegal	Sept-Dec2008	Open Randomized	28	<5 years	low	ARLM	ARLM	2	1	160	150
Faye2010_Senegal	Senegal	Sept-Dec2008	clinical trial; children	28			ASMQ	ARLM	2	7	160	154
Faye2012_CMR_SEN_CI	CMR_SEN_CI	2008-2009	non-inferiority	28	6 months- <= 7 years		ARLM	ASAQ	2	1	232	220
Faye2012_CMR_SEN_CI	CMR_SEN_CI	2008-2009	mult cent trial,open label	28			ASAQ	ASAQ	2	3	249	243
Guthmann2006_Angola	Angola	2004-04-01	Randomized, one centre	28	6-59 months	Hyperendemic_Mesoendemic	ARLM	ASAQ	2	1	64	60
Guthmann2006_Angola	Angola	2004-04-01		28			ASAQ	ASAQ	2	3	61	61
Hamour2005_Sudan	Sudan	2003	randomized,	28	<5 years	Endemic_High	ASAQ	ASAQ	2	3	80	51
Hamour2005_Sudan	Sudan	2003	one centre; children	28			ASSP	ASAQ	2	11	81	52
Ibrahium2007_Sudan	East Sudan	Sept-Nov2005	randomized,one centre	28		Endemic_High	ASAQ	ASAQ	2	3	42	40
Ibrahium2007_Sudan	East Sudan	Sept-Nov2005	children	28			ASSP	ASAQ	2	11	40	39
Kabanywanyi2007_Tanzanie	Tanzanie	May-Nov2004	Randomized; two centre children	28	6-59 months	High	ARLM	ASAQ	2	1	99	86
Kabanywanyi2007_Tanzanie	Tanzanie	May-Nov2004		28			ASAQ	ASAQ	2	3	76	48
Kakuru2014_Uganda	Uganda	Dec2007-Sept2008	Randomized trial	28	2 months- <6 years	High	ARLM	ARLM	2	1	205	127
Kakuru2014_Uganda	Uganda	Dec2007-Sept2008	one-centre, children	28			DHPP	ARLM	2	13	165	149
Kayentao2012_Mali	Bamako_Mali	Nov2007-Sept2008	multi-centre, phase 3, open label, Randomized	28	<=12 years	low	ARLM	ARLM	2	1	180	165
Kayentao2012_Mali	Bamako_Mali	Nov2007-Sept2008	controlled trial	28			ASPY	ARLM	2	9	355	329
KindeGazard2012_Benin	Benin	Jul-oct2008 and	Randomized trial	28		Endemic	ASNAPH	ARLM	2	8	84	82
KindeGazard2012_Benin	Benin	May-Sept2009	children; French article	28			ARLM	ARLM	2	1	90	90
Kobbe2008_Ghana	Ghana	Oct2006-Sept2007	Randomized,open label	28	<5 years	holoendemic, perennial	ARLM	ASAQ	2	1	123	95
Kobbe2008_Ghana	Ghana	Oct2006-Sept2007	two-centre	28		seasonal	ASAQ	ASAQ	2	3	123	88
Maiga2015_Mali	Mali	2004-2005	Randomized,	28	6-59 months	Hyper endemic	AQSP	AQSP	2	2	304	293
Maiga2015_Mali	Mali	2004-2005	open label; two centre	28			ASSP	AQSP	2	11	306	293
Martensson2005_Zanzibar	Tanzania	Nov2002-Feb2003	Multicenter, randomized	28	6-59 months	Holoendemic-Perennial_High	ARLM	ARLM	2	1	200	197
Martensson2005_Zanzibar	Tanzania	Nov2002-Feb2003	open label, children	28		Holoendemic-Perennial_High	ASAQ	ARLM	2	3	208	191
Martensson2008_Tanzanie	Tanzania	2001	randomized, two centre	28_42	6-8 months	Holoendemic	ARLM	ASAQ	2	1	200	185
Martensson2008_Tanzanie	Tanzania	2001	children	28_42			ASAQ	ASAQ	2	3	208	188
Men2008_Kenya	Kenya	April-July2007	two-arm Randomized	28	<5 years	High	ARLM	ARLM	2	1	73	62
Men2008_Kenya	Kenya	April-July2007	children	28			DHPP	ARLM	2	13	73	59
Menan2011_CMR_CotIV_SEN	Afrique	Sept 2008-Feb2009	multi-sites,Randomized, controlled	28	>=2 years	seasonal-intense	ARLM	ARLM	2	1	206	195
Menan2011_CMR_CotIV_SEN	Afrique	Sept 2008-Feb2009	open-label, children and adults	28			DHPPT	ARLM	2	14	212	204
Meremikwu2006_Nigeria	Nigeria	Sept-Nov2004	Randomized controlled trial	14-28	6-59 months	Perennial, High	ARLM	ASAQ	2	1	60	47
Meremikwu2006_Nigeria	Nigeria	Sept-Nov2004	children	14-28			ASAQ	ASAQ	2	3	60	47
Mohamed2006_Sudan	Sudan		2-centre,open label;	28	children and adults	Low	ARLM	ARLM	2	1	72	71
Mohamed2006_Sudan	Sudan		children and adults	28			ASSP	ARLM	2	11	71	70
Muhindo2014_Uganda	Uganda	Oct2011-Dec2012	randomized clinical trial	28	4- 5 years	Mesoendemic	ARLM	ARLM	2	1	96	44
Muhindo2014_Uganda	Uganda	Oct2011-Dec2012	children	28			DHPP	ARLM	2	13	106	93
Mukhtar2007_Sudan	Sudan	Oct-Dec2004 and	Randomized, three-centre	28	>= 5 years	Low endemic	ARLM	ARLM	2	1	80	72
Mukhtar2007_Sudan	Sudan	Oct-Dec2005	children and adults	28			ASSP	ARLM	2	11	80	65
Mutabingwa2005_Tanzania	Tanzania	July-Sept2002	Randomized, single centre	28	4-59 months	High	ARLM	ARLM	3	1	519	504
Mutabingwa2005_Tanzania	Tanzania	July-Sept2002	children	28			AQSP	ARLM	3	2	507	332
Mutabingwa2005_Tanzania	Tanzania	July-Sept2002	open label in children	28			ASAQ	ARLM	3	3	515	457
Nankabirwa2010_Uganda	Uganda	Feb-July2008	randomized, two-centre	28_42	8-14 years	Mesoendemic	AQSP	AQSP	2	2	200	103
Nankabirwa2010_Uganda	Uganda	Feb-July2008	children	28_42			DHPP	AQSP	2	13	198	173
Ndiaye2009_Afrique	Mali_CMR_SEN_MADA	March2006-Dec2006	Multicentre,Randomized,	28	<5years and >5 years		ARLM	ARLM	2	1	312	297
Ndiaye2009_Afrique	Mali_CMR_SEN_MADA	March2006-Dec2006	controlled,investogator blinded	28			ASAQ	ASAQ	2	3	629	594
Ndiaye2011_Senegal	Senegal	Feb2005-Aug2005	Randomized, open label	28	1- 60 years; 60% <12 years	Seasonal	ARLM	ASAQ	2	1	182	175
Ndiaye2011_Senegal	Senegal	Feb2005-Aug2005	one centre, children and adults	28			ASAQ	ASAQ	2	3	184	180
Nhama2014_Mozambique	Mozambique	june2011-jan2012	Multisite, randomized, open label	28	6 - 59 months	Perrenial	ARLM	ASAQ	2	1	439	335
Nhama2014_Mozambique	Mozambique	june2011-jan2012		28			ASAQ	ASAQ	2	3	261	232
Owusu_Agyei2008_Ghana	Ghana	June2005-May2006	randomized, open	28		holoendemic, perennial, seasonal	ARLM	ARLM	3	1	223	192
Owusu_Agyei2008_Ghana	Ghana	June2005-May2006	label, children	28			ASAQ	ARLM	3	3	220	205
Owusu_Agyei2008_Ghana	Ghana	June2005-May2006		28			ASCD	ARLM	3	6	178	156
Premji2009_Africa	BF_GH_TANZ_NIG_KENY	June2006-august2007	Multisite, Randomized, double blind	28	< 5 years, 5- <15 years	low-moderate-high	ARLM	ARLM	2	1	458	403
Premji2009_Africa	BF_GH_TANZ_NIG_KENY	June2006-august2007	children	28			ASCD	ARLM	2	6	914	791
Sagara2006_Mali	Mali	2003-2004	randomized, one centre	28	children(>=6 months)	seasonal, high	ARLM	ARLM	2	1	303	301
Sagara2006_Mali	Mali	2003-2004	open label	28	and adults		ASSMP	ARLM	2	10	303	302
Sagara2008_Mali	Mali	Aug2004-Feb2005	Randomized, bloc code, one centre	28	<5 years, >=5 years (65%)	hyper-endemic; seasonal	ARLM	ARLM	2	1	235	221
Sagara2008_Mali	Mali	Aug2004-Feb2005	children and adults	28			ASMQ	ARLM	2	7	235	218
Sagara2009_Africa	CMR_MALI_SUDAN_RWA	Aug2004-fev2005	Multicentre, Randomized	28	1-70 years		ARLM	ARLM	2	1	450	414
Sagara2009_Africa	CMR_MALI_SUDAN_RWA	Aug2004-fev2005	children and adults	28			ASSMP	ARLM	2	10	934	886
Sagara2012_Mali	Mali	july2005-July2007	randomized clinical trails, open label	28	<5 years (60%), >=5 ans	seasonal	ARLM	ASAQ	3	1	634	628
Sagara2012_Mali	Mali	july2005-July2007	children and adults	28	0.5 years - 68 years		ASAQ	ASAQ	3	3	601	593
Sagara2012_Mali	Mali	july2005-July2007		28			ASSP	ASAQ	3	11	667	664
Sawa2013_Kenya	Kenya	April-June2009	Randomized trial	28_42	6 months-10 years	High	ARLM	ARLM	2	1	153	115
Sawa2013_Kenya	Kenya	April-June2009	children	28_42			DHPP	ARLM	2	13	145	129
Sondo2015_BurkinaFaso	Burkina Faso	sept2010-oct2012	Randomized, open label	28	<5 years	Seasonal	ARLM	ASAQ	2	1	340	259
Sondo2015_BurkinaFaso	Burkina Faso	sept2010-oct2012	two-centre	28			ASAQ	ASAQ	2	3	340	275
Sow2016_Senegal	Senegal	January-march2016	Randomized,	28-42	adult and children	seasonal	ARLM	ARLM	3	1	139	129
Sow2016_Senegal	Senegal	January-march2016	comparative studies	28	adult and children		ASAQ	ARLM	3	3	130	116
Sow2016_Senegal	Senegal	January-march2016	analytical; French article	28	adult and children		DHPP	ARLM	3	12	124	113
Sowunmi2007_Nigeria	Nigeria	Nov2005-Jan2006	randomized,open label	28	<=10 years	Perennial, seasonal	ARLM	ARLM	2	1	90	84
Sowunmi2007_Nigeria	Nigeria	Nov2005-Jan2006	sigle centre children	28			AQSP	ARLM	2	2	91	90
Sylla2013_Senegal	Senegal	2011-2012	Open label Randomized trial	28	<15 years	Seasonal	ARLM	ASAQ	3	1	178	176
Sylla2013_Senegal	Senegal	2011-2012	two-centre	28	<18 yrs		ASAQ	ASAQ	3	3	180	175
Sylla2013_Senegal	Senegal	2011-2012		28			DHPP	ASAQ	3	13	176	170
Tahar2014_Yaounde	Cameroon	2008-2009	randomized, one centre	28	<5 years	High	ASAQ	ASAQ	2	3	70	60
Tahar2014_Yaounde	Cameroon	2008-2009		28			ASATPG	ASAQ	2	5	100	95
Tine2012_Senegal	Senegal	sept-dec 2010	randomized, open label; two-centre	28_42_63	>15 years	seasonal	ARLM	ARLM	2	1	153	148
Tine2012_Senegal	Senegal	Sept-Dec 2010	adults	28_42_63			ASMQ	ARLM	2	7	157	150
Tinto2014_BurkFaso	Burkina Faso	Sept2008-Jan2010	Non-inferiority Randomized trial	28_42	children	seasonal	ARLM	ASAQ	2	1	170	148
Tinto2014_BurkFaso	Burkina Faso	Sept2008-Jan2010		28_42	children		ASAQ	ASAQ	2	3	170	145
Toure2009_CoteIvoire	CoteIvoire	Vov2006-jan2007	Randomized,one centre	28	11-77 years	high	ARLM	ARLM	2	1	62	60
Toure2009_CoteIvoire	CoteIvoire	Nov2006-jan2007	children and adults	28			ASNAPH	ARLM	2	8	63	62
Toure2011_CoteIvoire	Cote Ivoire	June18-Sept20_2007	Randomized clinical trial, open label	28	6-59 months	high	ARLM	ARLM	2	1	79	73
Toure2011_CoteIvoire	Cote Ivoire	June18-Sept20_2007	children	28			ASMQ	ARLM	2	7	77	74
Tshefu2010_DRC	demoRep Congo	Jan2007-April2008	Randomized, double blind, non-inferiority	28	3-60 years	High	ARLM	ARLM	2	1	423	364
Tshefu2010_DRC	demoRep Congo	Jan2007-April2008	multi-sites; children and adults	28			ASPY	ARLM	2	9	849	776
VandenBroek2005	Sudan	Sept2003-Jan2004	Open label Randomized trial	42	6-59 months	medium-high	ASAQ	ASAQ	2	3	134	96
VandenBroek2005	Sudan	Sept2003-Jan2004	children	42			ASSP	ASAQ	2	11	135	112
Wanzira2014_Uganda	Uganda	May 2007-june 2011	Randomized study	28	median=10.5 months	Mesoendemic	ARLM	ARLM	2	1	158	55
Wanzira2014_Uganda	Uganda	May 2007-june 2011	children	28			DHPP	ARLM	2	13	154	110
Yavo2011_CMR_SEN_COTI	Afrique	Nov2006-may2008	randomized, multicentric study, open label	28	<14 years (63%),		ARLM	ARLM	2	1	187	180
Yavo2011_CMR_SEN_COTI	Afrique	Nov2006-may2008	children and adults	28	2-77 years		DHPP	ARLM	2	13	197	190
Yavo2015_CoteIvoire	Cote Ivoire	June-Sept2012	Randomized, open label	28	>=2 yrs	High	ARLM	ASAQ	2	1	146	144
Yavo2015_CoteIvoire	Cote Ivoire	June-Sept2012	one-centre	28			ASAQ	ASAQ	2	3	143	141
Yeka2008_Uganda	Uganda	Aug2006-April2007	Randomized trial, one centre	42	6months-10 years	moderate	ARLM	ARLM	2	1	199	131
Yeka2008_Uganda	Uganda	Aug2006-April2007	children	42	< 5 years (85%)		DHPP	ARLM	2	13	215	186
Yeka2013_Uganda	Uganda	Dec2007-April2009	Randomized, open label, one area	28	6 months -59 months	Intense perrenial	ARLM	ARLM	2	1	35	14
Yeka2013_Uganda	Uganda	Dec2007-April2009		28			DHPP	ARLM	2	13	72	54
Yeka2014_Uganda	Uganda	June2008-June2010	Randomized, open label controlled trials	28	< 5 years	Intense perrenial	ARLM	ASAQ	2	1	208	194
Yeka2014_Uganda	Uganda	June2008-June2010	children	28			ASAQ	ASAQ	2	3	208	192
Zongo2007_BurkFaso	Burkina Faso	NR	multicentre,randomized, open label	28-42	>=6months	seasonal	ARLM	AQSP	3	1	188	121
Zongo2007_BurkFaso	Burkina Faso		children	28-42	<5 years		AQSP	AQSP	3	2	184	149
Zongo2007_BurkFaso	Burkina Faso			28-42			DHPP	AQSP	3	13	187	159
Zongo2015_BukFaso	Burkina Faso	Aug2009-Jan2010	randomized, children	28	3-59 months	seasonal	AQSP	AQSP	2	2	742	199
Zongo2015_BukFaso	Burkina Faso	Aug2009-Jan2010		28	3-59 mois		DHPP	AQSP	2	13	757	161
* Set of randomized trials conducted by Basco et al and analysed for publication by Whegang et al_2010
NR: not reported

## Sheet: 109 pairwise contrasts
N arms	YEAR	Trials	Treat arms	Treat 1	Treat 2	event1	n1	event2	n2	Total participants
4	2014	Djalle2014_RCA	ARLM;ASAQ;AQSP;ASSMP	AQAS	AQSP	55	68	57	65
3	2007	Dorsey2007_Uganda	ARLM;AQSP;ASAQ	AQAS	AQSP	118	156	106	145
4	2007	Faye2007_Senegal	ARLM;ASAQ;ASMQ;AQSP	AQAS	AQSP	160	161	284	289
3	2005	Mutabingwa2005_Tanzania	ARLM;ASAQ;AQSP	AQAS	AQSP	232	261	335	439
										1584
4	2011	ABC_Study_group2011	ASAQ;ARLM;ASCDDHPP	AQAS	ARLM	880	1002	1094	1226
2	2008	Adjei2008_Ghana	ASAQ;ARLM	AQAS	ARLM	102	116	97	111
3	2015	Akindeh2015_Muteng_Garoua	ARLM;DHPP;ASAQ	AQAS	ARLM	243	288	119	144
2	2013	Ali2013_Cameroon	ASAQ;ARLM	AQAS	ARLM	54	73	62	77
2	2006	Burkiwa2006_Uganda	ARLM;ASAQ	AQAS	ARLM	209	211	205	208
4	2014	Djalle2014_RCA	ARLM;ASAQ;AQSP;ASSMP	AQAS	ARLM	55	68	52	65
3	2007	Dorsey2007_Uganda	ARLM;AQSP;ASAQ	AQAS	ARLM	56	66	59	66
2	2012	Espie2012_DRC	ASAQ;ARLM	AQAS	ARLM	41	53	47	54
2	2008	Falade2008_Nigeria	ASAQ;ARLM	AQAS	ARLM	46	53	47	54
3	2014	Falade2014_Nigeria	ASAQ;ARLM;ASAQCPH	AQAS	ARLM	198	249	243	251
4	2007	Faye2007_Senegal	ARLM;ASAQ;ASMQ;AQSP	AQAS	ARLM	160	161	144	145
2	2010	Faye2010_SEN_COTIV	ASAQ;ARLM	AQAS	ARLM	61	63	60	64
2	2012	Faye2012_CMR_SEN_CI	ASAQ;ARLM	AQAS	ARLM	40	42	39	40
2	2006	Guthmann2006_Angola	ASAQ;ARLM	AQAS	ARLM	48	76	86	99
2	2007	Kabanywanyi2007_Tanzanie	ASAQ;ARLM	AQAS	ARLM	90	90	83	84
2	2008	Kobbe2008_Ghana	ARLM;ASAQ	AQAS	ARLM	188	208	185	200
2	2005	Martensson2005_Zanzibar	ARLM;ASAQ	AQAS	ARLM	195	206	204	212
2	2008	Matensson2008_Tanzanie	ASAQ;ARLM	AQAS	ARLM	47	60	47	60
2	2006	Meremikwu2006_Nigeria	ARLM;ASAQ	AQAS	ARLM	72	80	65	80
3	2005	Mutabingwa2005_Tanzania	ARLM;ASAQ;AQSP	AQAS	ARLM	791	914	403	458
2	2009	Ndiaye2009_Afrique	ARLM;ASAQ	AQAS	ARLM	414	450	886	934
2	2011	Ndiaye2011_Senegal	ASAQ;ARLM	AQAS	ARLM	593	601	628	634
2	2014	Nhama2014_Mozambique	ARLM;ASAQ	AQAS	ARLM	593	601	664	667
3	2008	Owusi_Agyei2008_Ghana	ARLM;ASAQ;ASCD	AQAS	ARLM	628	634	664	667
3	2012	Sagara2012_Mali	ASAQ;ASSP;ARLM	AQAS	ARLM	60	70	95	100
2	2015	Sondo2015_BurkinaFaso	ARLM;ASAQ	AQAS	ARLM	73	79	74	77
3	2016	Sow2016_Senegal	ASAQ;DHPP;ARLM	AQAS	ARLM	364	423	776	849
3	2013	Sylla2013_Senegal	AQAS;DHPP;ARLM	AQAS	ARLM	141	143	144	146
2	2014	Tinto2014_BurkFaso	ASAQ;ARLM	AQAS	ARLM	149	184	159	187
2	2015	Yavo2015_CoteIvoire	ASAQ;ARLM	AQAS	ARLM	95	113	99	105
2	2014	Yeka2014_Uganda	ASAQ;ARLM	AQAS	ARLM	110	130	100	124
										15695
3	2014	Falade2014_Nigeria	ASAQ;ARLM;ASAQCPH	AQAS	ASAQCPH	359	360	160	161
2	2014	Tahar2014_Yaounde	ASAQ;ASATPG	AQAS	ASATPG	192	208	194	208
4	2011	ABC_Study_group2011	ASAQ;ARLM;ASCD;DHPP	AQAS	ASCD	880	1002	326	413
3	2008	Owusi_Agyei2008_Ghana	ARLM;ASAQ;ASCD	AQAS	ASCD	115	153	129	145
4	2007	Faye2007_Senegal	ARLM;ASAQ;ASMQ;AQSP	AQAS	ASMQ	284	289	144	145
2	2010	Ayede2010_Nigeria	ASSMP;ASAQ	AQAS	ASSMP	233	250	219	250
4	2014	Djalle2014_RCA	ARLM;ASAQ;ASSMP	AQAS	ASSMP	55	68	50	58
2	2005	Basco2005_Yaounde	ASAQ;ASSP	AQAS	ASSP	43	60	50	61	ASAQ
2	2007	Bonnet2007_Guinea	ASAQ;ASSP	AQAS	ASSP	101	110	98	110
2	2009	Bonnet2009_DRC	ASAQ;ASSP	AQAS	ASSP	97	148	90	143
2	2005	Hamour2005_Sudan	ASSP;ASAQ	AQAS	ASSP	127	205	149	165
2	2007	Ibrahium2007_Sudan	ASAQ;ASSP	AQAS	ASSP	165	180	329	355
3	2012	Sagara2012_Mali	ASAQ;ASSP;ARLM	AQAS	ASSP	148	153	150	157
2	2005	VandenBroek2005	ASSP;ASAQ	AQAS	ASSP	205	220	156	178
										2245
4	2011	ABC_Study_group2011	ASAQ;ARLM;ASCD;DHPP	AQAS	DHPP	880	1002	1336	1475
3	2015	Akindeh2015_Muteng_Garoua	ARLM;DHPP;ASAQ	AQAS	DHPP	243	288	236	288
2	2006	Basco2006_Yaounde	ASAQ;DHPP	AQAS	DHPP	52	62	58	61
2	2007	Basco2007_Yaounde	ASAQ;DHPP	AQAS	DHPP	73	92	84	91
3	2016	Sow2016_Senegal	ASAQ;DHPP;ARLM	AQAS	DHPP	96	134	112	135
3	2013	Sylla2013_Senegal	AQAS;DHPP;ARLM	AQAS	DHPP	131	199	186	215
										4042
4	2014	Djalle2014_RCA	ARLM;ASAQ;AQSP;ASSMP	AQSP	ARLM	57	65	52	65
3	2007	Dorsey2007_Uganda	ARLM;AQSP;ASAQ	AQSP	ARLM	41	53	46	53
2	2007	Fanello2007_Rwanda	ARLM;AQSP	AQSP	ARLM	359	360	144	145
4	2007	Faye2007_Senegal	ARLM;ASAQ;ASMQ;AQSP	AQSP	ARLM	155	159	158	163
3	2005	Mutabingwa2005_Tanzania	ARLM;ASAQ;AQSP	AQSP	ARLM	301	303	302	303
2	2007	Sowunmi2007_Nigeria	ARLM;AQSP	AQSP	ARLM	190	197	180	187
3	2007	Zongo2007_BurkFaso	DHPP;ARLM;AQSP	AQSP	ARLM	120	139	110	124
										2316
2	2006	Basco2006_2	AQSP;ASMQ	AQSP	ASMQ	55	67	60	69
4	2007	Faye2007_Senegal	ARLM;ASAQ;ASMQ;AQSP	AQSP	ASMQ	150	160	154	160
4	2014	Djalle2014_RCA	ARLM;ASAQ;AQSP;ASSMP	AQSP	ASSMP	57	65	50	58
2	2015	Maiga2015_Mali	ASSP;AQSP	AQSP	ASSP	62	73	59	73
2	2011	Nankabirwa2010_Uganda	AQSP;DHPP	AQSP	DHPP	221	235	218	235
3	2007	Zongo2007_BurkFaso	DHPP;ARLM;AQSP	AQSP	DHPP	400	515	302	507
2	2015	Zongo2015_BukFaso	DHPP;AQSP	AQSP	DHPP	302	507	450	519
										2518
3	2014	Falade2014_Nigeria	ASAQ;ARLM;ASAQCPH	ARLM	ASAQCPH	359	360	284	289
4	2011	ABC_Study_group2011	ASAQ;ARLM;ASCD;DHPP	ARLM	ASCD	1094	1226	326	413
3	2008	Owusi_Agyei2008_Ghana	ARLM;ASAQ;ASCD	ARLM	ASCD	275	340	259	340
2	2009	Premji2009_Africa	ASCD;ARLM	ARLM	ASCD	90	91	84	90
4	2007	Faye2007_Senegal	ARLM;ASAQ;ASMQ;AQSP	ARLM	ASMQ	243	249	220	232
2	2010	Faye2010_Senegal	ASMQ;ARLM	ARLM	ASMQ	51	80	52	81
2	2008	Sagara2008_Mali	ASMQ;ARLM	ARLM	ASMQ	175	180	170	176
2	2012	Tine2012_Senegal	ASMQ;ARLM	ARLM	ASMQ	149	184	121	188
2	2011	Toure2011_CoteIvoire	ASMQ;ARLM	ARLM	ASMQ	199	742	161	757
										2869
2	2012	KindeGazard2012	ARLM;ASNAPH	ARLM	ASNAPH	191	208	197	200
2	2009	Toure2009_CoteIvoire	ARLM;ASNAPH	ARLM	ASNAPH	121	188	159	187
2	2012	Kayentao2012_Mali	ASPY;ARLM	ARLM	ASPY	293	304	293	306
2	2010	Tshefu2010_DRC	ASPY;ARLM	ARLM	ASPY	205	220	192	223
4	2014	Djalle2014_RCA	ARLM;ASAQ;AQSP;ASSMP	ARLM	ASSMP	52	65	50	58
2	2006	Sagara2006_Mali	ARLM;ASSMP	ARLM	ASSMP	175	180	176	178
2	2009	Sagara2009_Africa	ASSMP;ARLM	ARLM	ASSMP	176	178	170	176
										835
2	2006	Mohamed2006_Sudan	ARLM;ASSP	ARLM	ASSP	103	200	173	198
2	2007	Mukhtar2007_Sudan	ASSP;ARLM	ARLM	ASSP	180	184	175	182
3	2012	Sagara2012_Mali	ASAQ;ASSP;ARLM	ARLM	ASSP	145	170	148	170
										1104
4	2011	ABC_Study_group2011	ASAQ;ARLM;ASCD;DHPP	ARLM	DHPP	1094	1226	1336	1475
2	2010	Adam2010_Sudan	DHPP;ARLM	ARLM	DHPP	73	74	75	75
3	2015	Akindeh2015_Muteng_Garoua	ARLM;DHPP;ASAQ	ARLM	DHPP	119	144	236	288
2	2009	Arinaitwe2009_Uganda	ARLM;DHPP	ARLM	DHPP	205	320	306	351
2	2009	Bassat2009_Afrique_5pays	DHPP;ARLM	ARLM	DHPP	459	514	938	1039
2	2011	Borrmann2011_Kenya_1	ARLM;DHPP	ARLM	DHPP	64	73	118	149
2	2011	Borrmann2011_Kenya_2	ARLM;DHPP	ARLM	DHPP	150	168	72	84
2	2014	Kakuru2014_Uganda_TCC	ARLM;DHPP	ARLM	DHPP	88	123	95	123
2	2008	Men2008_Kenya	ARLM;DHPP	ARLM	DHPP	71	72	70	71
2	2014	Muhindo2014_Uganda	ARLM;DHPP	ARLM	DHPP	594	629	297	312
2	2013	Sawa2013_Kenya	ARLM;DHPP	ARLM	DHPP	60	62	62	63
3	2016	Sow2016_Senegal	ASAQ;DHPP;ARLM	ARLM	DHPP	55	158	110	154
3	2013	Sylla2013_Senegal	AQAS;DHPP;ARLM	ARLM	DHPP	14	35	54	72
2	2014	Wanzira2014_Uganda	ARLM;DHPP	ARLM	DHPP	192	223	156	178
2	2011	Yavo2011_CMR_SEN_COTI	DHPP;ARLM	ARLM	DHPP	95	113	86	111
2	2008	Yeka2008_Uganda	ARLM;DHPP	ARLM	DHPP	86	111	99	105
2	2013	Yeka2013_Uganda	ARLM;DHPP	ARLM	DHPP	110	130	120	139
3	2007	Zongo2007_BurkFaso	DHPP;ARLM;AQSP	ARLM	DHPP	457	515	450	519
										9998
2	2011	Menan2011_CMR_CotIV_SEN	ARLM;DHPPT	ARLM	DHPPT	44	96	93	106
2	2006	Basco2006_3	ASCD;ASSP	ASCD	ASSP	53	86	74	82
4	2011	ABC_Study_group2011	ASAQ;ARLM;ASCD;DHPP	ASCD	DHPP	1336	1475	326	413
